# Supplementary material for: Pasta as a Source of Minerals in the Diets of Poles; Effect of Culinary Processing of Pasta on the Content of Minerals
Source: MDPI journal article supplement (doi:10.3390/foods10092131), 2021-09-09
Supplement: s1 [file s1]

**Table S1.** Characteristic of analysed products.

| Pasta type | Ingredients                                                   | Cooking time, min. | Salt amount in raw product, g per kg * | Weight of pasta before cooking (g) | Weight of pasta after cooking (g) ** |
|------------|---------------------------------------------------------------|--------------------|----------------------------------------|------------------------------------|--------------------------------------|
| Penne      | Wheat flour                                                   | 8                  | 0                                      | 100                                | 319                                  |
|            | Wheat flour, durum flour                                      | 9                  | < 0.01                                 | 100                                | 306                                  |
|            | Wheat flour, turmeric                                         | 9                  | < 0.01                                 | 100                                | 294                                  |
|            | Wholemeal wheat flour                                         | 6                  | 0.1                                    | 100                                | 312                                  |
|            | Wholemeal durum flour                                         | 7                  | 0.1                                    | 100                                | 318                                  |
|            | Wholemeal spelt flour                                         | 7                  | 0.3                                    | 100                                | 320                                  |
|            | Wholemeal durum flour                                         | 13                 | 0.15                                   | 100                                | 312                                  |
| Ditalini   | Durum flour                                                   | 12                 | < 0.1                                  | 100                                | 301                                  |
|            | Wheat flour, durum flour                                      | 10                 | 0                                      | 100                                | 311                                  |
|            | Wheat flour                                                   | 5                  | 0                                      | 100                                | 290                                  |
|            | Wholemeal wheat flour, durum flour                            | 10                 | 0.01                                   | 100                                | 306                                  |
|            | Wholemeal durum flour, wheat flour; BIO                       | 10                 | 0.05                                   | 100                                | 295                                  |
| Gigli      | Durum flour                                                   | 5                  | 0                                      | 100                                | 258                                  |
|            | Wheat flour                                                   | 6                  | 0                                      | 100                                | 251                                  |
|            | Spelt flour                                                   | 8                  | 0                                      | 100                                | 274                                  |
|            | Wholemeal durum flour, wholemeal barley flour, amaranth flour | 7                  | 0.2                                    | 100                                | 258                                  |
|            | Wholemeal durum flour, wheat flour; BIO                       | 5                  | 0.5                                    | 100                                | 250                                  |
| Creste     | Durum flour, wheat flour, eggs, water                         | 11                 | 0.04                                   | 100                                | 305                                  |
|            | Wheat flour                                                   | 5                  | 0                                      | 100                                | 303                                  |
|            | Durum flour                                                   | 12                 | 0                                      | 100                                | 300                                  |
|            | Wheat flour, durum flour, eggs                                | 8                  | 0.07                                   | 100                                | 314                                  |
| Fusilli    | Rice flour, corn starch, tapioca starch                       | 7                  | 0.02                                   | 100                                | 321                                  |
|            | Wheat flour                                                   | 6                  | 0                                      | 100                                | 320                                  |
|            | Wheat flour                                                   | 9                  | 0                                      | 100                                | 314                                  |
|            | Wholemeal wheat flour                                         | 7                  | 0.01                                   | 100                                | 313                                  |
|            | Wholemeal spelt flour                                         | 9                  | < 0.01                                 | 100                                | 334                                  |
|            | Wholemeal durum flour                                         | 9                  | 0.5                                    | 100                                | 321                                  |
|            | Wholemeal wheat flour                                         | 4                  | 0.011                                  | 100                                | 321                                  |
| Filini     | Wheat flour, eggs, turmeric                                   | 3                  | 0.09                                   | 100                                | 255                                  |
|            | Spelt flour, turmeric                                         | 5                  | 0.015                                  | 100                                | 263                                  |
|            | Spelt flour; BIO                                              | 5                  | 0.015                                  | 100                                | 265                                  |
|            | Spelt flour                                                   | 4                  | 0                                      | 100                                | 264                                  |
|            | Wholemeal spelt flour                                         | 4                  | 0.1                                    | 100                                | 261                                  |
|            | Wholemeal spelt flour; BIO                                    | 8                  | < 0.01                                 | 100                                | 271                                  |
|            | Wholemeal spelt flour; BIO                                    | 8                  | 0.01                                   | 100                                | 251                                  |

\* Values declared by producer; \*\* Mean values

**Tabela S2.** RDA and AI values for minerals according to Polish standards, mg.

|                     | Na          | K           | Ca                | Mg              | Zn           | Cu         | Fe            | Mn              |
|---------------------|-------------|-------------|-------------------|-----------------|--------------|------------|---------------|-----------------|
|                     | AI          | AI          | RDA               | RDA             | RDA          | RDA        | RDA           | AI              |
| Adults              | 1500 (W, M) | 3500 (W, M) | 1200 (W) 1000 (M) | 320 (W) 420 (M) | 8 (W) 11 (M) | 0.9 (W, M) | 18 (W) 10 (M) | 1.8 (W) 2.3 (M) |
| Children, age 1–3   | 750 (W, M)  | 800 (W, M)  | 700 (W, M)        | 80 (W, M)       | 3 (W, M)     | 0.3 (W, M) | 7 (W, M)      | 1.2 (W, M)      |
| Children, age 4–6   | 1000 (W, M) | 1100 (W, M) | 1000 (W, M)       | 130 (W, M)      | 5 (W, M)     | 0.4 (W, M) | 10 (W, M)     | 1.5 (W, M)      |
| Children, age 7–12  | 1300 (W, M) | 2400 (W, M) | 1300 (W, M)       | 240 (W, M)      | 8 (W, M)     | 0.7 (W, M) | 10 (W, M)     | 1.6 (W) 1.9 (M) |
| Children, age 13–15 | 1500 (W, M) | 3000 (W, M) | 1300 (W, M)       | 360 (W) 410 (M) | 9 (W) 11 (M) | 0.9 (W, M) | 15 (W) 12 (M) | 1.6 (W) 2.2 (M) |
| Children, age 16–18 | 1500 (W, M) | 3500 (W, M) | 1300 (W, M)       | 360 (W) 410 (M) | 9 (W) 11 (M) | 0.9 (W, M) | 15 (W) 12 (M) | 1.6 (W) 2.2 (M) |

**Table S3.** Pearson correlation coefficients for NaCl+NR.

|    | Na     | K      | Ca     | Mg     | Zn     | Cu     | Fe     | Mn     |
|----|--------|--------|--------|--------|--------|--------|--------|--------|
| Na | 1.000  | -0.403 | 0.729  | 0.291  | -0.088 | -0.622 | -0.165 | -0.674 |
| K  | -0.403 | 1.000  | -0.218 | 0.723  | 0.662  | -0.175 | -0.499 | 0.827  |
| Ca | 0.729  | -0.218 | 1.000  | 0.380  | 0.205  | -0.547 | -0.513 | -0.357 |
| Mg | 0.291  | 0.723  | 0.380  | 1.000  | 0.783  | -0.510 | -0.790 | 0.288  |
| Zn | -0.088 | 0.662  | 0.205  | 0.783  | 1.000  | -0.136 | -0.732 | 0.322  |
| Cu | -0.622 | -0.175 | -0.547 | -0.510 | -0.136 | 1.000  | 0.068  | -0.101 |
| Fe | -0.165 | -0.499 | -0.513 | -0.790 | -0.732 | 0.068  | 1.000  | -0.107 |
| Mn | -0.674 | 0.827  | -0.357 | 0.288  | 0.322  | -0.101 | -0.107 | 1.000  |

value  $r$ ; strong correlations are marked in red; NaCl + NR – cooked with salt and not rinsed

**Table S4.** Pearson correlation coefficients for NaCl+R.

|    | Na     | K      | Ca     | Mg     | Zn     | Cu     | Fe     | Mn     |
|----|--------|--------|--------|--------|--------|--------|--------|--------|
| Na | 1.000  | -0.403 | 0.748  | 0.129  | -0.117 | -0.571 | -0.302 | -0.684 |
| K  | -0.403 | 1.000  | -0.413 | 0.803  | 0.927  | -0.096 | -0.506 | 0.374  |
| Ca | 0.748  | -0.413 | 1.000  | 0.121  | -0.088 | -0.541 | -0.411 | -0.517 |
| Mg | 0.129  | 0.803  | 0.121  | 1.000  | 0.953  | -0.345 | -0.882 | -0.041 |
| Zn | -0.117 | 0.927  | -0.088 | 0.953  | 1.000  | -0.330 | -0.722 | 0.242  |
| Cu | -0.571 | -0.096 | -0.541 | -0.345 | -0.330 | 1.000  | 0.178  | -0.119 |
| Fe | -0.302 | -0.506 | -0.411 | -0.882 | -0.722 | 0.178  | 1.000  | 0.402  |
| Mn | -0.684 | 0.374  | -0.517 | -0.041 | 0.242  | -0.119 | 0.402  | 1.000  |

value *r*; strong correlations are marked in red; NaCl + R – cooked with salt and rinsed

**Table S5.** Pearson correlation coefficients for NR.

|    | Na     | K      | Ca     | Mg     | Zn     | Cu     | Fe     | Mn     |
|----|--------|--------|--------|--------|--------|--------|--------|--------|
| Na | 1.000  | 0.591  | 0.757  | 0.284  | 0.613  | -0.483 | -0.492 | 0.023  |
| K  | 0.591  | 1.000  | 0.577  | 0.400  | 0.536  | -0.618 | -0.380 | 0.747  |
| Ca | 0.757  | 0.577  | 1.000  | 0.440  | 0.538  | -0.452 | -0.172 | 0.012  |
| Mg | 0.284  | 0.400  | 0.440  | 1.000  | 0.824  | -0.266 | -0.639 | 0.102  |
| Zn | 0.613  | 0.536  | 0.538  | 0.824  | 1.000  | -0.093 | -0.901 | 0.243  |
| Cu | -0.483 | -0.618 | -0.452 | -0.266 | -0.093 | 1.000  | -0.078 | -0.130 |
| Fe | -0.492 | -0.380 | -0.172 | -0.639 | -0.901 | -0.078 | 1.000  | -0.267 |
| Mn | 0.023  | 0.747  | 0.012  | 0.102  | 0.243  | -0.130 | -0.267 | 1.000  |

value  $r$ ; strong correlations are marked in red; NR – cooked without salt and not rinsed

**Table S6.** Pearson correlation coefficients for R.

|    | Na     | K      | Ca     | Mg     | Zn     | Cu     | Fe     | Mn     |
|----|--------|--------|--------|--------|--------|--------|--------|--------|
| Na | 1.000  | 0.537  | 0.968  | 0.602  | 0.544  | -0.336 | -0.525 | -0.073 |
| K  | 0.537  | 1.000  | 0.657  | 0.564  | 0.437  | -0.602 | -0.346 | 0.634  |
| Ca | 0.968  | 0.657  | 1.000  | 0.770  | 0.675  | -0.397 | -0.616 | 0.059  |
| Mg | 0.602  | 0.564  | 0.770  | 1.000  | 0.914  | -0.190 | -0.767 | 0.261  |
| Zn | 0.544  | 0.437  | 0.675  | 0.914  | 1.000  | 0.172  | -0.888 | 0.335  |
| Cu | -0.336 | -0.602 | -0.397 | -0.190 | 0.172  | 1.000  | -0.130 | 0.049  |
| Fe | -0.525 | -0.346 | -0.616 | -0.767 | -0.888 | -0.130 | 1.000  | -0.082 |
| Mn | -0.073 | 0.634  | 0.059  | 0.261  | 0.335  | 0.049  | -0.082 | 1.000  |

value *r*; strong correlations are marked in red; R – cooked without salt and rinsed
